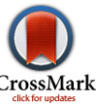

# Aldosterone Induced Galectin-3 Secretion In Vitro and In Vivo: From Cells to Humans

Yen-Hung Lin<sup>1</sup>, Chia-Hung Chou<sup>2</sup>, Xue-Ming Wu<sup>3</sup>, Yi-Yao Chang<sup>4</sup>, Chi-Sheng Hung<sup>1</sup>, Ying-Hsien Chen<sup>1</sup>, Yu-Lin Tzeng<sup>1</sup>, Vin-Cent Wu<sup>1</sup>, Yi-Lwun Ho<sup>1\*</sup>, Fon-Jou Hsieh<sup>2</sup>, Kwan-Dun Wu<sup>1</sup>, and the TAIPAI Study Group<sup>1</sup>

**1** Department of Internal Medicine, National Taiwan University Hospital and National Taiwan University College of Medicine, Taipei, Taiwan, **2** Department of Obstetrics and Gynecology, National Taiwan University Hospital and National Taiwan University College of Medicine, Taipei, Taiwan, **3** Department of Internal Medicine, Taoyuan General Hospital, Taoyuan, Taiwan, **4** Department of Cardiology, Cardiovascular Center, Far Eastern Memorial Hospital, New Taipei City, Taiwan

## Abstract

**Context:** Patients with primary aldosteronism are associated with increased myocardial fibrosis. Galectin-3 is one of the most important mediators between macrophage activation and myocardial fibrosis.

**Objective:** To investigate whether aldosterone induces galectin-3 secretion in vitro and in vivo.

**Methods and Results:** We investigated the possible molecular mechanism of aldosterone-induced galectin-3 secretion in macrophage cell lines (THP-1 and RAW 264.7 cells). Aldosterone induced galectin-3 secretion through mineralocorticoid receptors via the PI3K/Akt and NF- $\kappa$ B transcription signaling pathways. In addition, aldosterone-induced galectin-3 expression enhanced fibrosis-related factor expression in fibroblasts. We observed that galectin-3 mRNA from peripheral blood mononuclear cells and serum galectin-3 levels were both significantly increased in mice implanted with aldosterone pellets on days 7 and 14. We then conducted a prospective preliminary clinical study to investigate the association between aldosterone and galectin-3. Patients with aldosterone-producing adenoma had a significantly higher plasma galectin-3 level than patients with essential hypertension. One year after adrenalectomy, the plasma galectin-3 level had decreased significantly in the patients with aldosterone-producing adenoma.

**Conclusion:** This study demonstrated that aldosterone could induce galectin-3 secretion in vitro and in vivo.

**Citation:** Lin Y-H, Chou C-H, Wu X-M, Chang Y-Y, Hung C-S, et al. (2014) Aldosterone Induced Galectin-3 Secretion In Vitro and In Vivo: From Cells to Humans. PLoS ONE 9(9): e95254. doi:10.1371/journal.pone.0095254

**Editor:** Wing-Kin Syn, Institute of Hepatology, Foundation for Liver Research, United Kingdom

**Received:** June 21, 2013; **Accepted:** March 25, 2014; **Published:** September 2, 2014

**Copyright:** © 2014 Lin et al. This is an open-access article distributed under the terms of the Creative Commons Attribution License, which permits unrestricted use, distribution, and reproduction in any medium, provided the original author and source are credited.

**Funding:** This study was supported by grants from the National Taiwan University Hospital (NTUH 101-001974), National Taiwan University (National Taiwan University Cutting-Edge Steering Research 10R71608-1), NTU-NTUH MediaTek Innovative Medical Electronics Research Center (PC851), Taiwan National Science Council (NSC 100-2314-B-002-139, NSC 102-2314-B-002-078-MY3), and Taiwan National Science Council support for the Center for Dynamical Biomarkers and Translational Medicine, National Central University, Taiwan (NSC 101-2911-I-008-001). The funders had no role in study design, data collection or analysis, decision to publish, or preparation of the manuscript.

**Competing Interests:** The authors have declared that no competing interests exist.

\* E-mail: ylho@ntu.edu.tw

† Membership of the Taiwan Primary Aldosteronism Investigation (TAIPAI) Study Group is provided in the Acknowledgments.

## Introduction

An excess of aldosterone plays a pivotal role in the development and progression of cardiac diseases such as primary aldosteronism (PA) and heart failure (HF)[1,2]. PA affects 5–13% of patients with hypertension, and is characterized by an inappropriate production of aldosterone[1]. Increasing evidence indicates that PA is much more prevalent than previously believed, and that this disease is the most frequent cause of secondary hypertension[1]. Using aldosterone blockade with spironolactone has been shown to improve the outcome of HF patients[3], and is now the standard therapy for severe HF.

Aldosterone has been found to induce myocardial fibrosis in the cardiovascular system. In an animal study, aldosterone infusion with high salt intake induced cardiac hypertrophy and myocardial interstitial fibrosis and scarring in the right and left ventricles[4]. In clinical studies, patients with PA have been found to have more

prominent left ventricular (LV) mass and cardiac fibrosis than patients with essential hypertension (EH), which may be due to the high plasma aldosterone levels in these patients[5,6]. Unilateral aldosterone-producing adenoma (APA) is the most common subtype of PA; it can be cured by adrenalectomy after which the increased LV mass and myocardial fibrosis regress[5,7–10].

Despite the direct effect of aldosterone to induce fibrosis, aldosterone also induces macrophage activation and low grade inflammation, which may play an important role in cardiac fibrosis and myocardial dysfunction[2]. Deletion of mineralocorticoid receptors (MR) from macrophages has been shown to protect against deoxycorticosterone/salt-induced cardiac fibrosis, which implies that macrophages play an important role in aldosterone-induced cardiac fibrosis[11]. However, the mediators of aldosterone through inflammation to fibrosis are still unclear. Among a number of candidate mediators, galectin-3 was found to

be one of the most likely candidates in several animal [12,13] and clinical studies [14,15]. Galectin-3 is a  $\beta$ -galactoside-binding animal lectin which is highly expressed and secreted by macrophages [16]. Galectin-3 has been shown to be involved in fibrosis in various organs, including the lungs [17], liver [18], kidneys [19], and heart [12]. In an animal model of renal fibrosis, knocking-out the galectin-3 gene was found to decrease renal fibrosis without changing macrophage recruitment or macrophage proinflammatory cytokine profiles [19]. In addition, the adoptive transfer of wild-type macrophages into galectin-3 knocked-out mice was found to restore the fibrotic phenotype in kidneys, suggesting that galectin-3 expression and secretion is a key mechanism linking macrophages to myofibroblast activation and tissue fibrosis [19]. A recent study further showed that aldosterone increased vascular galectin-3 expression, inflammation, and collagen formation in wild-type mice, whereas no changes occurred in galectin-3 knocked-out mice [20].

We hypothesized that aldosterone plays an important role in galectin-3 production in macrophages, which may further cause fibrosis in the cardiovascular system. Therefore, we conducted this study to evaluate galectin-3 secretion by aldosterone stimulation *in vitro* and *in vivo*.

## Materials and Methods

### Cell cultures of THP-1, Raw 264.7, human fibroblast 293T and mouse fibroblast NIH/3T3 cell lines

THP-1, RAW 264.7, 293T and NIH/3T3 cell lines were obtained from the American Type Culture Collection (Rockville, MD, USA). THP-1 and RAW 264.7 cell lines were maintained in RPMI 1640 medium supplemented with 2 mmol/L glutamine, 100 U/mL penicillin, 100  $\mu$ g/mL streptomycin to inhibit bacterial contamination, and 10% FCS for cell growth. The human fibroblast 293T and mouse fibroblast NIH/3T3 cell lines were cultured in DMEM containing 10% FBS, 100 U/mL penicillin, and 100  $\mu$ g/mL streptomycin to inhibit bacterial contamination.

### Concentration of aldosterone-induced galectin-3 secretion

THP-1 and RAW 264.7 cells ( $10^6$ /ml) were treated with different doses of aldosterone ( $10^{-9}$ ,  $10^{-8}$ ,  $10^{-7}$ ,  $10^{-6}$ ,  $10^{-5}$  M). After 24 hours, the cell culture supernatants were collected for galectin-3 detection.

### Timing of aldosterone-induced galectin-3 secretion

THP-1 and RAW 264.7 cells ( $10^6$ /ml) were treated with aldosterone ( $10^{-6}$  M), for 0, 6, 12, 18, 24, 30, 36, 42, and 48 hours. The cell culture supernatants were then collected for galectin-3 analysis.

### Detection of galectin-3 level by enzyme immunoassay

The level of galectin-3 in the cell culture supernatant was determined using a commercially available enzyme immunoassay (EIA) kit (R&D Systems) according to the manufacturer's instructions. The catalog numbers for human galectin-3 and mouse galectin-3 were DGAL30 and DY1197, respectively. Each measurement was performed in triplicate, and the average value was then recorded as ng/mL.

### Aldosterone induced galectin-3 secretion through mineralocorticoid or glucocorticoid receptors

THP-1 and RAW 264.7 cells ( $10^6$ /ml) were pretreated with  $10^{-7}$  M of spironolactone (Sigma, St. Louis, MO, USA; dissolved

in ethanol) or  $10^{-7}$  M RU-486 (Sigma, St. Louis, MO, USA; dissolved in DMSO) 1 hour prior to aldosterone ( $10^{-6}$  M) treatment. After 24 hours, the cell culture supernatants were collected for galectin-3 detection by EIA.

### Real-time quantitative reverse transcription polymerase chain reaction

Glyceraldehyde-3-phosphate dehydrogenase (GAPDH), galectin-3, fibronectin, and procollagen (I) mRNA expressions were measured using a fluorescein quantitative real-time PCR detection system (Light Cycler DNA Master SYBR Green I; Roche Molecular Biochemicals, Indianapolis, IN). The primer pairs were as follows: GAPDH, 5'-GGG AAG GTG AAG GTC GG-3' and 5'-TGG ACT CCA CGA CGT ACT CAG-3'; galectin-3, 5'-GGCCACTGATTGTGCCCTTAT and 5'-TCTTCTTCCCTTCCCAGT [21]; mouse galectin-3, 5'-AGC TTA TCC TGG CTC AAC TG and 5'-CGG AGG TTC TTC ATC CGA TG; human fibronectin, 5'-CAG GAT CAC TTA CGG AGA AAC AG-3' and 5'-GCC AGT GAC AGC ATA CAC AGT G-3' [22], mouse fibronectin forward-5'-GTCAGTGTCTCCAGTGTCTAC-3' and 5'-TGGCTTGCTGGCCAATCAGT-3', human procollagen (I), 5'-CTC GAG GTG GAC ACC ACC CT-3' and 5'-CAG CTG GAT GGC CAC ATC GG-3' [23], mouse collagen (I) 5'-TGTTTCGTTGTTCTCAGGGTAG-3' and 5'-TTGTCGTAG-CAGGGTCTTTC-3'. The amplification program consisted of one cycle of initial incubation at 61°C for 20 minute, followed by 50 cycles of denaturation at 95°C for 10 seconds, annealing at 55–57°C for 10 seconds, and extension at 72°C for 10 seconds. The amount of indicated mRNA was normalized by that of GAPDH mRNA and presented in arbitrary units, with 1 U corresponding to the value in the cells treated with the vehicle control.

### Down-stream pathway

THP-1 and RAW 264.7 cells ( $10^6$ /ml) were pretreated with the indicated inhibitors 1 hour prior to aldosterone ( $10^{-6}$  M) treatment. After 24 hours, the cell culture supernatants were collected for galectin-3 detection by EIA. The inhibitors were PD98059 (Sigma, St. Louis, MO, USA; ERK inhibitor), LY294002 (Sigma, St. Louis, MO, USA; phosphoinositide 3-kinase inhibitor), SB203580 (Sigma, St. Louis, MO, USA; p38 inhibitor), Ro318220 (Sigma, St. Louis, MO, USA; protein kinase C inhibitor), and SP600125 (Sigma, St. Louis, MO, USA; Jun N-terminal kinase inhibitor).

For nuclear factor (NF)- $\kappa$ B pathway analysis, THP-1 and RAW-264.7 cells were serum-starved for 24 hours and then pre-treated with  $10^{-7}$  M of spironolactone, LY294002 or BAY117082 (Sigma, St. Louis, MO, USA; NF- $\kappa$ B inhibitors) for 1 hour before  $10^{-6}$  M aldosterone treatment. Nuclear and cytosolic proteins were collected after 1 hour, and the level of the NF- $\kappa$ B p65 subunit was determined by Western blotting.

### Synthesis of NF- $\kappa$ B decoy oligodeoxynucleotides

We used synthetic double-stranded decoy oligodeoxynucleotide (ODN) cis elements to block the binding of nuclear factors to the promoter regions of targeted genes. The following conserved sequences of the phosphorothioate ODN between humans and mice were used: NF- $\kappa$ B decoy ODN: 5'-CCTTGAAGG-GATTTCCCTCC-3' and 3'-GGAAGTTCCTAAAGG-GAGG-5'; AP-1 decoy ODN: 5'-TGTCTGACTCATGTC-3' and 3'-CAGACTGAGTACA-5'; scrambled decoy ODN: 5'-TTGCCGTACCTGACTTAGCC-3' and 3'-AACGGCATG-GACTGAATCGG-5'. The ODNs were mixed with an equal

volume (10:1) of TransFast for 15 minutes, and then incubated with the cells in a serum-free medium.

### Preparation of conditioned medium

Cultures of the THP-1 and RAW 264.7 cells ( $2 \times 10^6$ /10-mm dish) were rinsed twice with PBS and then cultured in 5 ml of serum-free RPMI 1640 with aldosterone ( $10^{-6}$  M) or vehicle treatment for 24 hours. The conditioned medium was collected and then clarified by centrifugation ( $4^\circ\text{C}$ , 10,000 rpm, 5 minutes) to remove cell debris. A final solution of 25 mM HEPES buffer (pH 7.4), 1 mg  $\text{ml}^{-1}$  leupeptin, 1 mM phenylmethylsulfonyl fluoride, 1 mM EDTA, 0.02%  $\text{NaN}_3$ , and 0.1% BSA (Sigma) was added. The conditioned medium was then frozen and stored at  $-70^\circ\text{C}$  until use.

### RNA interference

Small interfering RNA (siRNA) duplexes were purchased from Santa Cruz Biotechnology (Santa Cruz, CA, USA). The targeted siRNAs for human galectin-3, mouse galectin-3, and control siRNA were sc-155994, sc-35443 and sc-37007, respectively. The THP-1 and Raw 264.7 cells were transfected with siRNA at a concentration of 25 nM in serum-free Opti-MEM using the Oligofectamine method (Invitrogen, Carlsbad, CA, USA).

### Cell growth determined by MTT assay

Human fibroblast 293T and mouse fibroblast NIH/3T3 cell lines were plated onto 96-well microplates at a density of  $5 \times 10^3$  cells/well with the conditioned media for cell growth assay. Briefly, the cells were cultured at  $37^\circ\text{C}$  for the indicated times, and 30  $\mu\text{l}$  of MTT solution (5 mg/ml) was then added into each well followed by incubation for 4 hours in darkness. Formazan grains were dissolved in DMSO, and the absorbance at 570 nm was read using an ELISA plate reader.

### Aldosterone release pellet implanted mouse model

Six-week-old ICR wild-type male mice were obtained from the Animal Center of the Medical College of National Taiwan University and kept in standard animal housing conditions under the guidelines for the care and use of experimental animals. The experiments were approved by the Animal Care and Use Committee of the Medical College of National Taiwan University. Mice with a similar body weight (25–30 g) were randomly divided into two treatment groups (vehicle and aldosterone;  $N = 5$  per group). The mice were implanted subcutaneously with a 20-d continuous aldosterone release pellet (Innovative Research of America, Sarasota, FL). The vehicle control mice received a placebo pellet. Mice whole blood was collected on days 0, 7, and 14. The sera used for galectin-3 and total RNA were purified from peripheral blood mononuclear cells and used for galectin-3 mRNA analysis.

### Patients

Seventeen patients with essential hypertension (EH) and 7 patients with APA who did not take spironolactone within the previous 6 months and who were prepared to receive adrenalectomy were enrolled. The patients were evaluated and registered in the Taiwan Primary Aldosteronism Investigation (TAIPAI) database. This database was established for quality assurance in one medical center (National Taiwan University Hospital, Taipei, Taiwan) and its three branch hospitals in different cities around Taiwan (National Taiwan University Hospital Yun-Lin branch, Yun-Lin, southern Taiwan; Far-Eastern Memorial Hospital, Taipei, northern Taiwan; and Tao-Yuan General Hospital,

Tao-Yuan, central Taiwan) [24,25]. The medical history of each patient including demographic and medication data was carefully recorded. Serum biochemistry studies of these patients were performed at the initial evaluation at National Taiwan University Hospital. Plasma aldosterone concentration (PAC) was measured by radioimmunoassay using a commercial kit (Aldosterone Maia Kit; Adaltis Italia, Bologna, Italy), and plasma renin activity (PRA) was measured as the generation of angiotensin-I *in vitro* using a commercially available radioimmunoassay kit (Cisbio, Bedford, MA). This study was approved by the Institutional Review Board of National Taiwan University Hospital, and all subjects provided written informed consent, including for the storage of their information in the hospital database and usage for research.

### Diagnosis of APA

The diagnosis of APA was established when all of the following “modified 4 corners score” criteria were met: (1) evidence of autonomous excess aldosterone production based on an aldosterone-renin ratio (ARR)  $>35$  or urine  $\geq 12 \mu\text{g}/24$  hours, and a TAIPAI score of more than 60% [26] and post-saline loading PAC  $>10 \text{ ng/dl}$ ; (2) lateralization of aldosterone secretion in adrenal vein sampling or during dexamethasone suppression NP-59 SPECT/computed tomography[27]; (3) evidence of adenoma in computed tomography scans; and (4) pathologically proven adenoma after adrenalectomy if the patient received surgery, and cure of hypertension without anti-hypertensive agents or improved hypertension, potassium, PAC, and PRA as described.

### Plasma galectin-3 analysis

Venous blood samples were collected in serum separation tubes after overnight fasting. After clotting and centrifugation, the serum was stored at  $-60^\circ\text{C}$  until analysis. Galectin-3 was measured by an ELISA kit (Bender Medsystems, Vienna, Austria) and measured on a Victor 2 plate reader (Perkin Elmer, Turku, Finland). Calibration of the assay was performed according to the manufacturer’s protocol. Values were normalized to a standard curve. The intra- and inter-assay variances for galectin-3 were 5.6% and 8.6%, respectively.

### Post-adrenalectomy follow-up

Clinical evaluation and plasma galectin-3 level measurements were performed 1 year after adrenalectomy. Hypertension was considered cured if the blood pressure decreased to 140/90 mm Hg or less after adrenalectomy, and anti-hypertensive medications were not required[28] one year post adrenalectomy [8]. The patients who were cured within one year but later developed hypertension were still classified as being cured.

### Statistical analysis

In the cell study, each experiment was performed in triplicate and all experiments were repeated at least three times on different occasions. A t test was used to evaluate statistically significant differences between the aldosterone treatment and vehicle control groups in the specified tests. In the human study, data were expressed as mean  $\pm$ SD. Comparisons for continuous data between the PA and EH patients were made using a t test. Differences between proportions were assessed by the chi-square or Fisher exact test. Comparisons between pre-operative and post-operative parameters were made using a paired t test. Pearson’s correlation test was used to analyze the association between two parameters. Data of PAC, PRA, and ARR were log-transformed before the correlation study due to the non-normality which was determined by the Kolmogorov-Smirnov test. Before further

analysis, the log-transformed data were tested again to assure the normality of distribution. A  $p$  value less than 0.05 was selected as the statistically significant cutoff value. A  $p$  value between 0.05 and 0.1 was considered to indicate borderline significance.

## Results

### Concentration and timing of aldosterone-induced galectin-3 secretion

Galectin-3 was synthesized in the cultured THP-1 and RAW 264.7 cells with aldosterone stimulation in a dose-dependent manner (Figure 1A, 2A). Aldosterone  $10^{-5}$  to  $10^{-7}$  M significantly induced galectin-3 secretion. After 12 hours of aldosterone ( $10^{-6}$  M) stimulation, galectin-3 secretion in the cultured THP-1 and RAW 264.7 cells was significantly increased (Figure 1B, 2B).

### Galectin-3 mRNA analysis

Aldosterone  $10^{-6}$  M significantly induced galectin-3 mRNA expression in the cultured THP-1 and RAW-264.7 cells (Figure 1C, 2C). This indicated that the changes in the expression of galectin-3 after aldosterone stimulation were through transcriptional regulation.

### Signal transduction pathway

The secretion of galectin-3 after aldosterone stimulation was inhibited by pretreated with  $10^{-7}$  M spironolactone, but not by  $10^{-7}$  M RU-486 (Figure 3, 4). This suggested that the secretion of galectin-3 was via mineralocorticoid receptors (MRs) rather than glucocorticoid receptors.

The induced secretion was blocked by LY294002, but not by PD98059, SB203580, Ro318220, or SP600125. This suggested that the induced secretion occurred via the PI3K/Akt pathway (Figure 5A, 6A). To confirm that the PI3K/Akt pathway was involved in the aldosterone signaling, spironolactone was used to evaluate whether or not MRs were upstream of the aldosterone-induced Akt phosphorylation. The result of p-Akt Western blotting revealed that the MRs were indeed upstream of the aldosterone-induced Akt phosphorylation (Figure 5B, 6B).

In transcriptional factor analysis, induction of galectin-3 secretion was blocked by the decoy ODN of NF- $\kappa$ B but not the decoy ODN of AP-1. This suggested that NF- $\kappa$ B is an important transcriptional factor in the secretion pathway (Figure 5C, 6C). Spironolactone and LY294002 were used to evaluate the roles of MRs and PI3K/Akt in the aldosterone-induced NF- $\kappa$ B activation. The results of NF- $\kappa$ B nuclear and cytosol Western blotting showed that MRs and PI3K/Akt were upstream of the aldosterone-induced NF- $\kappa$ B activation (Figure 5D, 6D).

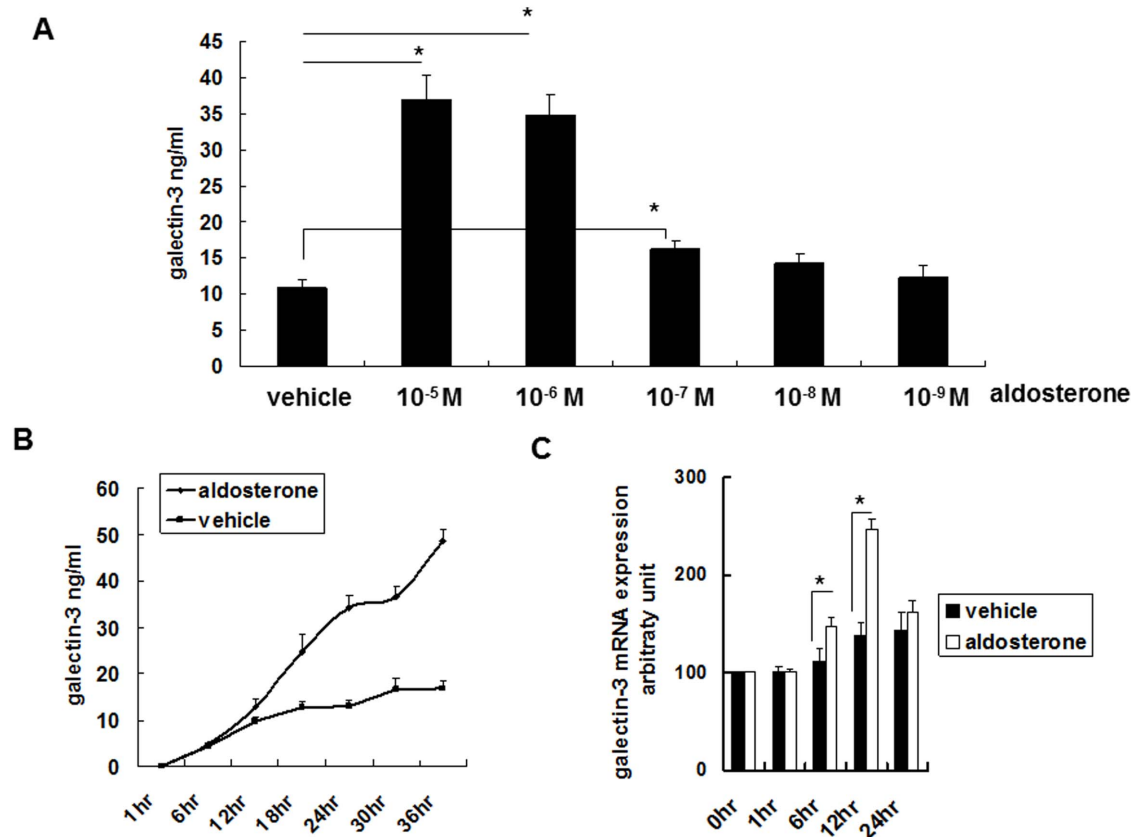

**Figure 1. Aldosterone induced galectin-3 expression in human monocyte cell line THP-1.** (A) Aldosterone induced galectin-3 expression dose dependently. THP-1 cells ( $1 \times 10^5$  cells/ml) were serum-starved for 24 h prior to 24-h aldosterone treatment with various concentrations as indicated. (B) Aldosterone induced galectin-3 protein expression time dependently. THP-1 cells ( $1 \times 10^6$  cells/ml) were serum-starved for 24 h prior to  $10^{-6}$  M aldosterone or vehicle treatment for various durations. (C) Aldosterone transcriptionally regulated galectin-3 expression. THP-1 cells ( $1 \times 10^6$  cells/ml) were serum-starved for 24 h prior to  $10^{-6}$  M aldosterone or vehicle treatment for various durations. \* $P < 0.05$ . doi:10.1371/journal.pone.0095254.g001

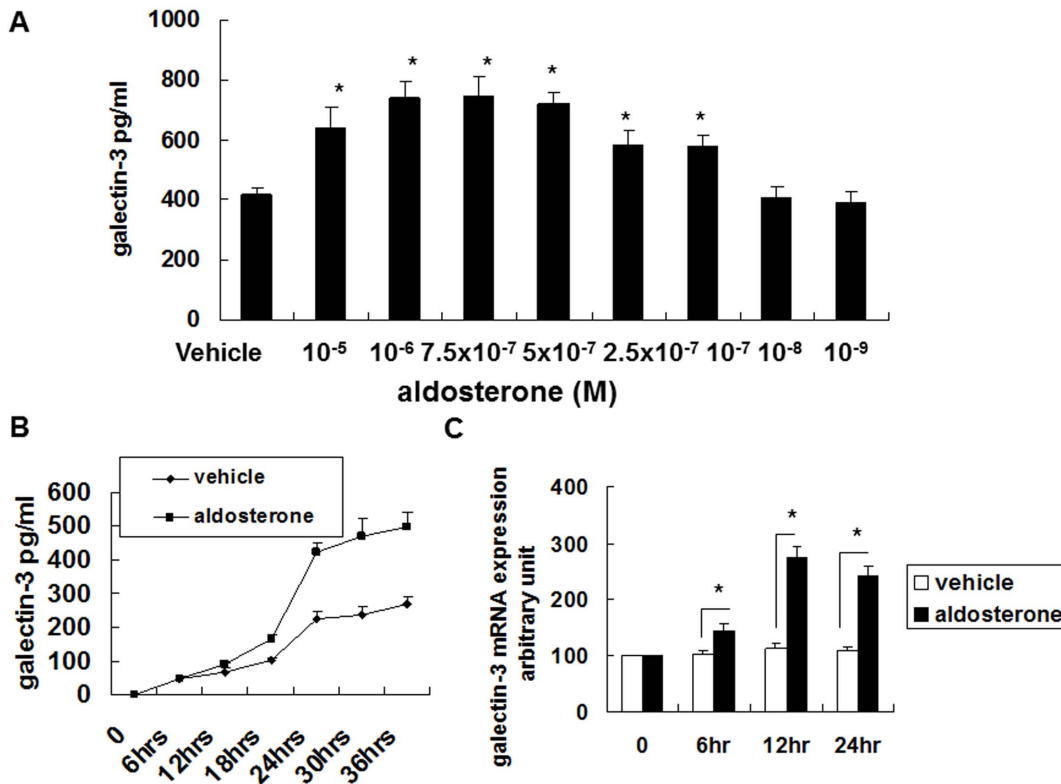

**Figure 2. Aldosterone induced galectin-3 expression in mouse macrophage cell line Raw 264.7.** (A) Aldosterone induced galectin-3 expression dose dependently. Raw 264.7 cells ( $1 \times 10^6$  cells/ml) were serum-starved for 24 h prior to 24-h aldosterone treatment with various concentrations as indicated. (B) Aldosterone induced galectin-3 protein expression time dependently. Raw 264.7 cells ( $1 \times 10^6$  cells/ml) were serum-starved for 24 h prior to  $10^{-6}$  M aldosterone or vehicle treatment for various durations. (C) Aldosterone transcriptionally regulated galectin-3 expression. Raw 264.7 cells ( $1 \times 10^6$  cells/ml) were serum-starved for 24 h prior to  $10^{-6}$  M aldosterone or vehicle treatment for various durations. \* $P < 0.05$ .

doi:10.1371/journal.pone.0095254.g002

Aldosterone-induced galectin-3 expression plays a critical role in enhancing fibrosis-related factor expression in fibroblasts

To evaluate the possible effect of aldosterone-induced galectin-3 expression on fibrosis, THP-1 and RAW 264.7 cells were

pretreated with galectin-3 siRNA or control siRNA in order to knockdown the galectin-3 expression prior to aldosterone stimulation. The conditioned medium was collected and cultured with the human fibroblast cell line 293T. The aldosterone-induced galectin-3 expression was strongly suppressed by galectin-3 siRNA (Figure 7A, 7D), however there was no significant effect of

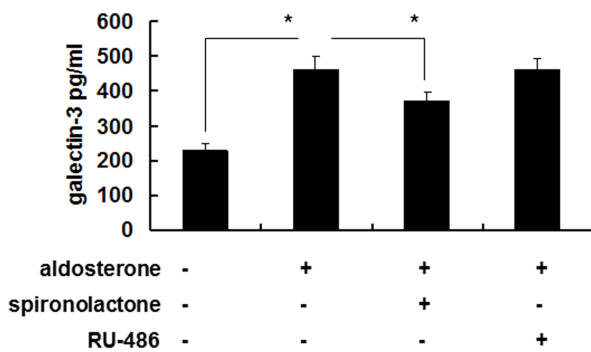

**Figure 3. Aldosterone induced galectin-3 expression mainly through MRs in human monocyte cell line THP-1.** THP-1 cells ( $1 \times 10^6$  cells/ml) were serum-starved for 24 h, and then treated with  $10^{-7}$  M of spironolactone or  $10^{-7}$  M of RU-486 for 1 h followed by  $10^{-6}$  M aldosterone or vehicle treatment for 24 h. The cell culture supernatants were then collected for galectin-3 detection by enzyme immunoassay. Comparison is between the indicated groups. \* $P < 0.05$ . MR = mineralocorticoid receptor.

doi:10.1371/journal.pone.0095254.g003

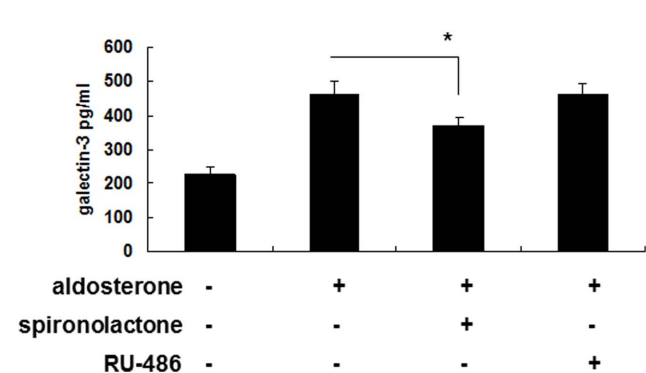

**Figure 4. Aldosterone induced galectin-3 expression mainly through MRs in macrophage cell line Raw 264.7.** Raw 264.7 cells ( $1 \times 10^6$  cells/ml) were serum-starved for 24 h, then treated with  $10^{-7}$  M of spironolactone or  $10^{-7}$  M of RU-486 for 1 h, followed by  $10^{-6}$  M aldosterone or vehicle treatment for 24 h. The cell culture supernatants were then collected for galectin-3 detection by enzyme immunoassay. \* $P < 0.05$ . MR = mineralocorticoid receptor

doi:10.1371/journal.pone.0095254.g004

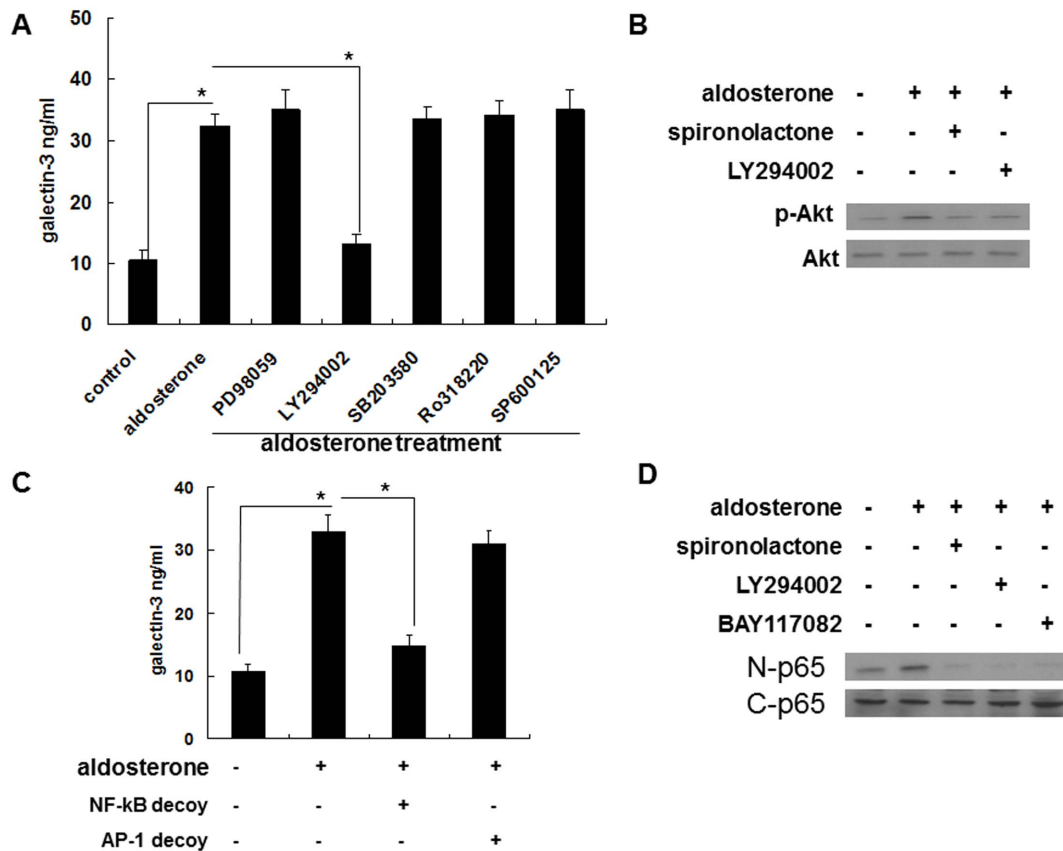

**Figure 5. Aldosterone induced galectin-3 expression in THP-1 cells via a MR/PI3K/Akt/NF-κB signaling pathway.** (A) Aldosterone induced galectin-3 expression in THP-1 cells via the PI3K/Akt signaling pathway. THP-1 cells were serum-starved for 24 h and then pre-treated with PD98059 (50 μg/ml), LY294002 (50 μg/ml), SB203580 (5 μg/ml), Ro318220 (5 nM), and SP600125 (10 μM) for 1 h prior to  $10^{-6}$  M aldosterone or vehicle treatment for 24 h. (B) Aldosterone induced Akt phosphorylation via MR-mediated signaling. THP-1 cells were serum-starved for 24 h, then pre-treated with different chemical inhibitors for 1 h prior to  $10^{-6}$  M aldosterone or vehicle treatment. After 30 minutes, total protein was collected and the expression level of the indicated protein was measured by Western blot with specific antibodies. (C) NF-κB was a prerequisite transcriptional factor in aldosterone-mediated galectin-3 expression. THP-1 cells were transfected with NF-κB decoy ODN, AP-1 decoy ODN and serum starved for 24 h, then treated with  $10^{-6}$  M aldosterone for another 24 h. \* $P < 0.05$ . (D) Aldosterone activated NF-κB via MR/PI3K/Akt signaling. THP-1 cells were serum-starved for 24 h and then pre-treated with  $10^{-7}$  M of spironolactone, LY294002 (50 μg/ml) or BAY117082 (10 μM) for 1 h before  $10^{-6}$  M aldosterone treatment. Nuclear and cytosolic proteins were collected after 1 h, and the level of the NF-κB p65 subunit was determined by Western blotting. MR = mineralocorticoid receptor. nuclear (N) p65 and cytosol (C) p65.  
doi:10.1371/journal.pone.0095254.g005

aldosterone-induced galectin-3 on cell growth of the 293T or NIH/3T3 cells (Figure 7B, 7E). Meanwhile, the effect of the conditioned medium on the expressions of fibronectin and procollagen (I) mRNA was determined, and the results revealed that aldosterone-induced galectin-3 significantly increased the expressions of fibronectin and procollagen (I) mRNA of the 293T and NIH/3T3 cells (Figure 7C, 7F).

#### Aldosterone induced galectin-3 expression in vivo

To confirm the effect of aldosterone-induced galectin-3 expression in vivo, ICR wild-type male mice were implanted subcutaneously with a 20-d continuous aldosterone release pellet, and serum galectin-3 levels were measured. Galectin-3 mRNA was analyzed from total RNA purified from peripheral blood mononuclear cells. The results showed that both were significantly increased in the aldosterone pellet implanted mice on days 7 and 14 (Figure 8a, 8b).

#### Patient characteristics

Sixteen EH patients and 7 APA patients who did not take spironolactone and received adrenalectomy within 6 months were

enrolled in this study. The clinical data are shown in Table 1. The APA patients had significantly higher PAC, ARR, log PAC, log ARR, and lower PRA than the patients with EH. Moreover, the APA patients had a significantly higher plasma galectin-3 level than the EH patients ( $2.0 \pm 0.9$  vs.  $1.3 \pm 0.7$  ng/ml,  $p = 0.039$ ). The plasma galectin-3 level was borderline significantly correlated with log PAC ( $r = -0.365$ ,  $p = 0.087$ ), but not log PRA, log ARR, systolic blood pressure, or diastolic blood pressure (all  $p > 0.10$ ).

#### Post-adrenalectomy follow-up

One year after adrenalectomy, 3 APA patients (38%) were cured of hypertension. In serological studies, log PAC significantly decreased and log PRA significantly increased (log PAC  $1.8 \pm 0.3$  to  $1.5 \pm 0.1$ ; log PRA  $-0.8 \pm 0.9$  to  $0.2 \pm 0.8$ , both  $p < 0.05$ ). The plasma galectin-3 level was also significantly decreased (from  $2.1 \pm 0.9$  to  $1.2 \pm 0.7$  ng/ml,  $p = 0.020$ ).

#### Discussion

The results of this study demonstrate a novel signal transduction pathway of galectin-3 secretion by aldosterone in macrophage cell

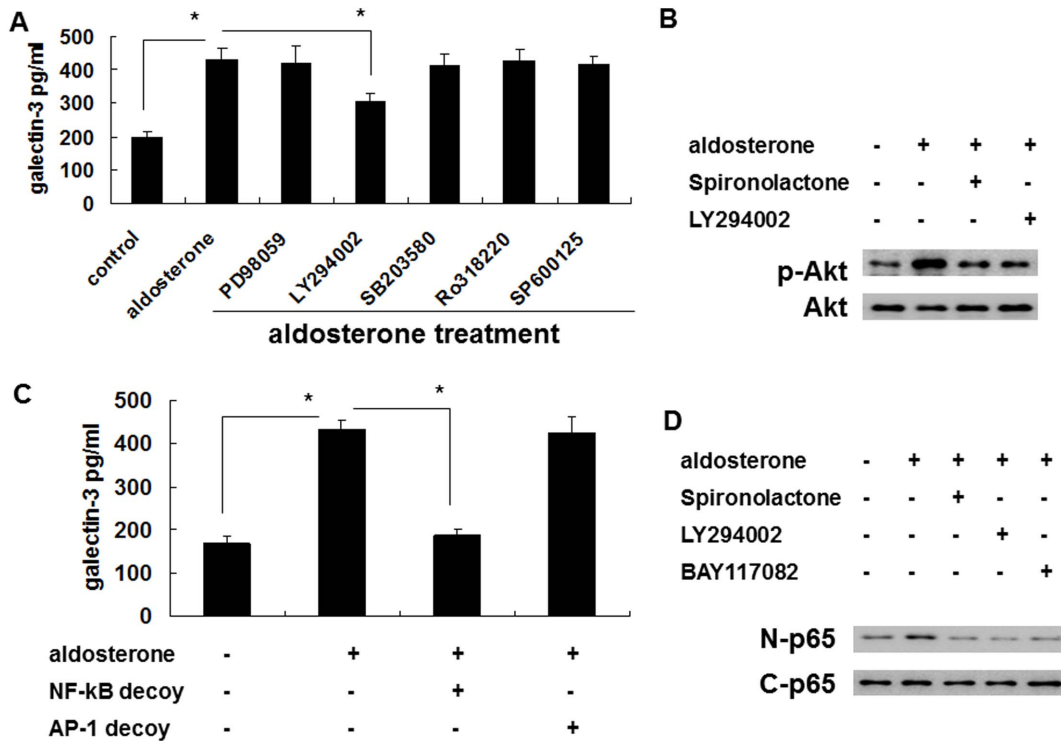

**Figure 6. Aldosterone induced galectin-3 expression in Raw 264.7 cells via a MR/PI3K/Akt/NF-κB signaling pathway.** (A) Aldosterone induced galectin-3 expression in Raw 264.7 cells via the PI3K/Akt signaling pathway. Raw 264.7 cells were serum-starved for 24 h and then pre-treated with PD98059 (50 μg/ml), LY294002 (50 μg/ml), SB203580 (5 μg/ml), Ro318220 (5 nM), and SP600125 (10 μM) for 1 h prior to  $5 \times 10^{-7}$  M aldosterone or vehicle treatment for 24 h. (B) Aldosterone induced Akt phosphorylation via MR-mediated signaling. Raw 264.7 cells were serum-starved for 24 h, then pre-treated with different chemical inhibitors for 1 h prior to  $5 \times 10^{-7}$  M aldosterone or vehicle treatment. After 30 minutes, total protein was collected and the expression level of the indicated protein was measured by Western blot with specific antibodies. (C) NF-κB was a prerequisite transcriptional factor in aldosterone-mediated galectin-3 expression. Raw 264.7 cells were transfected with NF-κB decoy ODN, AP-1 decoy ODN and serum starved for 24 h, then treated with  $5 \times 10^{-7}$  M aldosterone for another 24 h. \* $P < 0.05$ . (D) Aldosterone activated NF-κB via MR/PI3K/Akt signaling. Raw 264.7 cells were serum-starved for 24 h and then pre-treated with  $10^{-7}$  M of spironolactone, LY294002 (50 μg/ml) or BAY117082 (10 μM) for 1 h before  $5 \times 10^{-7}$  M aldosterone treatment. Nuclear and cytosolic proteins were collected after 1 h, and the level of the NF-κB p65 subunit was determined by Western blotting. MR= mineralocorticoid receptor; nuclear (N) p65 and cytosol (C) p65. doi:10.1371/journal.pone.0095254.g006

lines, and the impact of galectin-3 on collagen formation (Figure 9). Furthermore, we found that aldosterone could induce galectin-3 secretion by macrophages in a mouse model, and an association between aldosterone and galectin-3 in a preliminary clinical study.

Aldosterone can induce myocardial and vascular fibrosis, and aldosterone infusion with high salt intake has been shown to induce cardiac hypertrophy, myocardial interstitial fibrosis and scarring in the right and left ventricles[4]. Furthermore, aldosterone infusion has also been shown to induce increased interstitial fibrosis in the atria and pulmonary arteries[29] which is not influenced by systemic blood pressure. In a rat model, infra-renal aorta banding was found to induce hypertension and cardiac hypertrophy, but not to increase myocardial fibrosis[30].

The proposed mechanism of aldosterone-induced myocardial fibrosis has changed in recent years. Aldosterone-induced macrophage activation and low grade inflammation have been proven to play important roles in cardiac fibrosis[2]. Furthermore, Rickard et al demonstrated that specific deletion of macrophage MRs prevented cardiac fibrosis induced by deoxycorticosterone in a mouse model[11].

Galectin-3 has also been reported to play an important role in failing hearts and HF-related cardiac fibrosis. Sharma et al reported that galectin-3 was one of the most robustly over-expressed mediators in failing hearts in microarray studies[12]. Ochieng et al reported that galectin-3 interacts with various

ligands in the extracellular matrix (ECM), including laminin, synexin, integrins, and collagen[31], and Sharma et al suggested that activated cardiac macrophages produce galectin-3 and recognize the galectin-3 binding sites in cardiac fibroblasts and the ECM [12]. Sharma et al also showed that intrapericardial infusion of recombinant galectin-3 in healthy rats can result in a depressed LV ejection fraction and increased collagen volume fraction in the myocardium [12]. Further, they showed that cardiac macrophages were activated in failure-prone rat hearts, and that the expression of galectin-3 was increased and co-localized with activated myocardial macrophages[12]. Sharma et al also found galectin-3 binding sites in the ECM, and cardiac fibroblasts and galectin-3-induced cardiac fibroblast proliferation, collagen production, and cardiac dysfunction in rats. These findings support the relationship between inflammation and fibrosis, and provide a new insight into the mechanism in ECM turnover in HF. Further, the findings imply that galectin-3 may play an important role in the regulation of myocardial fibrosis and pathogenesis of HF. In our previous study on HF patients, serum galectin-3 was found to be significantly correlated with serum markers of the ECM, and that ECM turnover is an essential process in LV remodeling and interstitial fibrosis[15].

Galectin-3 is also a crucial factor in hyperaldosteronism in combination with hypertension-induced cardiac fibrosis[13] and vascular fibrosis[20]. A previous study reported that hyperaldo-

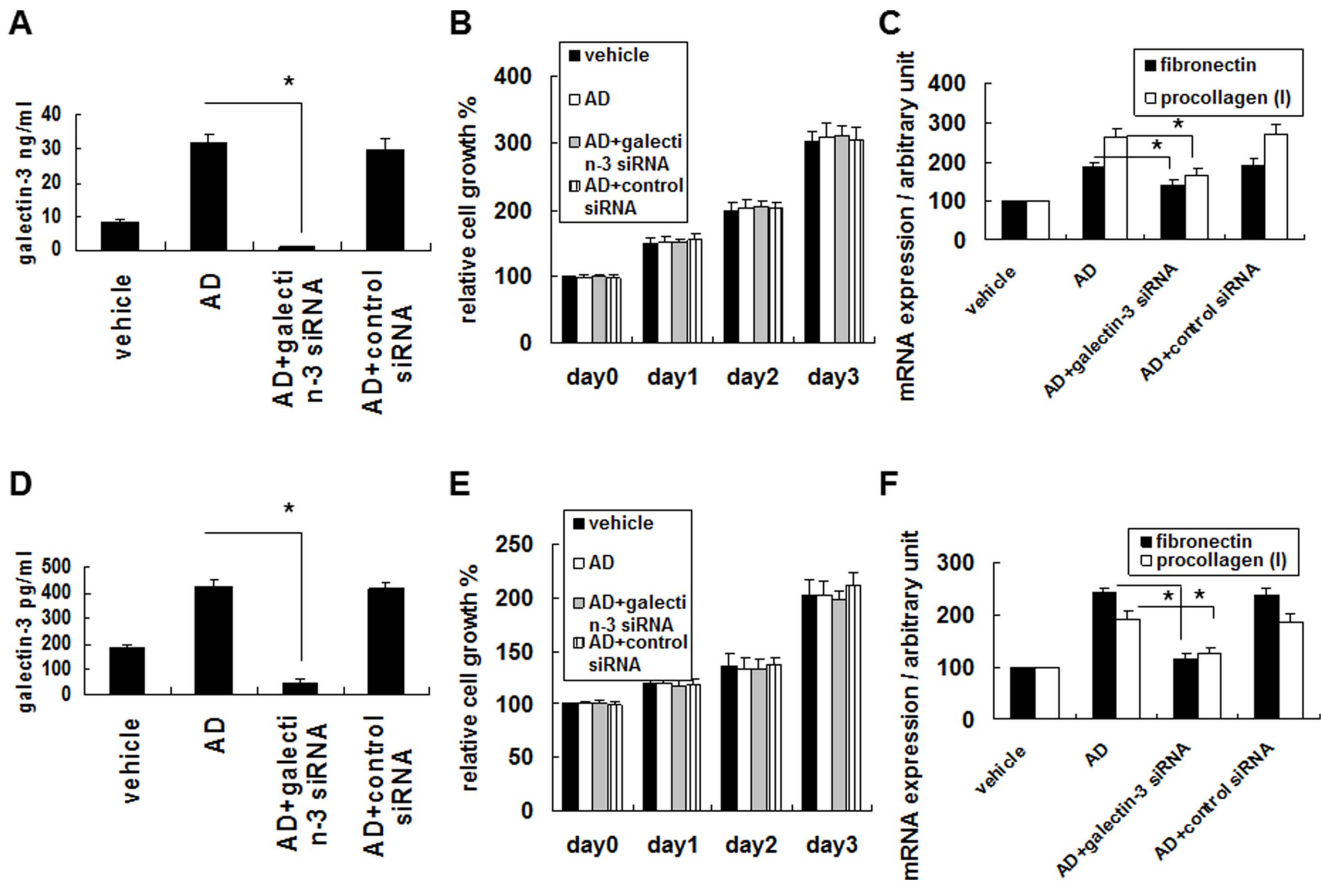

**Figure 7. Aldosterone-induced galectin-3 in THP-1 and RAW 264.7 cells enhanced fibrosis-related factor in fibroblasts.** (A) Effect of galectin-3 siRNA treatment on inhibiting aldosterone-induced galectin-3 expression. THP-1 cells were pretreated with galectin-3 siRNA or control siRNA for 24 h and then serum-starved for 24 h prior to  $10^{-6}$  M aldosterone or vehicle treatment for 24 h. The conditional medium was collected, and the level of galectin-3 was detected by enzyme immunoassay. (B) Effect of conditional medium from aldosterone-treated THP-1 cells on fibroblast cell growth. The conditional medium was collected and cultured with the human fibroblast cell line 293T. Cell growth was determined by MTT assay. Data were recorded as relative cell growth in the indicated conditions with the vehicle-treated conditional medium in lane 1 defined as 100%. \*,  $P < 0.05$  ( $n = 5$ ). (C) Effect of conditional medium from aldosterone-treated THP-1 cells on fibronectin and procollagen (I) mRNA expressions. Conditional medium as described in (A) was used to treat 293T cells. After 24 hours, the expressions of fibronectin and procollagen (I) mRNA were determined by real-time quantitative RT-PCR. Data were compared between the indicated groups. A paired Student's *t*-test was used to evaluate statistically significant differences between the indicated groups. \* $P < 0.05$ . (D) Effect of galectin-3 siRNA treatment on inhibiting aldosterone-induced galectin-3 expression. Raw 264.7 cells were pretreated with galectin-3 siRNA or control siRNA for 24 h, and then serum-starved for 24 h prior to  $10^{-6}$  M aldosterone or vehicle treatment for 24 h. The conditional medium was collected, and the level of aldosterone was detected by enzyme immunoassay. (E) Effect of conditional medium from aldosterone-treated RAW 264.7 cells on fibroblast cell growth. The conditional medium was collected and cultured with the mouse fibroblast cell line NIH/3T3. The cell growth was determined by MTT assay. Data were recorded as relative cell growth in the indicated conditions with the vehicle-treated conditional medium in lane 1 defined as 100%. \*,  $P < 0.05$  ( $n = 5$ ). (F) Effect of conditional medium from aldosterone-treated RAW 264.7 cells on fibronectin and procollagen (I) mRNA expressions. Conditional medium as described in (E) was used to treat NIH/3T3 cells. After 24 h, the expressions of fibronectin and procollagen (I) mRNA were determined by real-time quantitative RT-PCR. Data were compared between the indicated groups. A paired Student's *t*-test was used to evaluate statistically significant differences between the indicated groups. \* $P < 0.05$ . AD = aldosterone. doi:10.1371/journal.pone.0095254.g007

steronism combined with hypertension stimulated macrophage infiltration in the heart, and enhanced the mRNA level of galectin-3 [13]. Furthermore, blocking the MRs with eplerenone could reverse the effect of aldosterone on cardiac fibrosis and cardiac galectin-3 mRNA production. These findings not only demonstrate the importance of aldosterone on cardiac fibrosis, but also suggest the possible effect of galectin-3 secretion by aldosterone. Our study provides further evidence of galectin-3 secretion by aldosterone stimulation and the possible signal transduction pathway of the process. In addition, this is the first study to provide human evidence of increased galectin-3 secretion in patients with hyperaldosteronism and the effect of adrenalectomy on galectin-3 level.

In the current study, aldosterone-induced galectin-3 secretion started from  $10^{-7}$  M ( $1 \times 10^{-7}$  M in the THP-1 cell study and  $2.5 \times 10^{-7}$  M in the RAW 264.7 cell study). A normal human PAC is around  $0.2\text{--}1.0 \times 10^{-9}$  M, and the PAC in patients with PA is 2 to 10-fold higher than normal subjects. However, PA is a chronic disease. To investigate the long-term effects of aldosterone exposure we used a relatively high aldosterone concentration in the cell and animal studies.

Calvier et al detected intracellular galectin-3 mRNA and protein formation after aldosterone stimulation in vascular smooth muscle cells, and concluded that galectin-3 is essential in aldosterone-induced collagen production in vascular smooth muscle cells [32]. The aldosterone effect was found to be significant



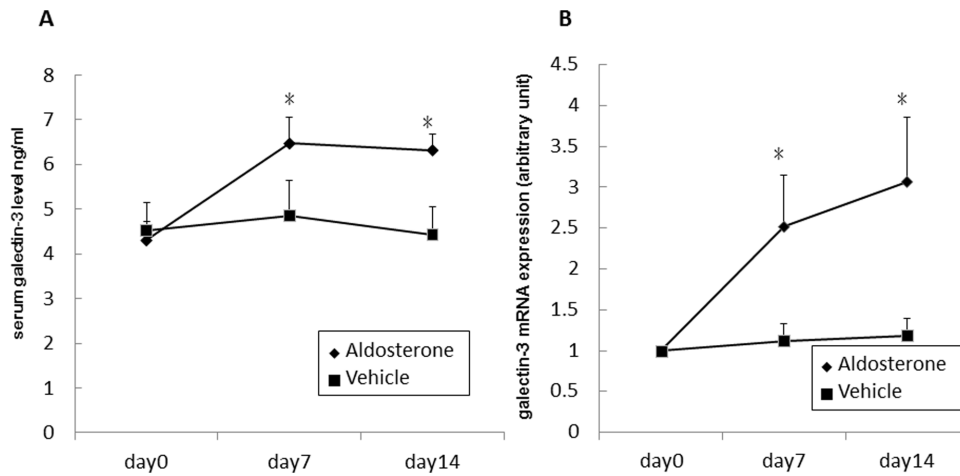

**Figure 8. Aldosterone induced galectin-3 expression in vivo.** ICR wild-type male mice were implanted subcutaneously with a 20-d continuous aldosterone release pellet. Mice whole blood was collected on days 0, 7, and 14. (A) Serum level of galectin-3 was detected by enzyme immunoassay. (B) Total RNA was purified from PBMCs. Galectin-3 mRNA expression was determined by quantitative RT-PCR. \* $P < 0.05$ . PBMCs = peripheral blood mononuclear cells. doi:10.1371/journal.pone.0095254.g008

from  $10^{-9}$  M in that study, which is lower than the dosage used in the current study. However, there are several differences between the two studies. First, Calvier et al detected intracellular galectin-3 mRNA and protein, and as a result, vascular smooth muscle cells acted as both producers and effectors of galectin-3. This result, however, fails to explain the findings of the study by Rickard et al [11], in which deletion of macrophage MRs was found to protect the process of cardiac fibrosis, implying that macrophage MRs are involved in the formation of cardiac fibrosis. Second, we detected the secretion of galectin-3 from macrophages in our study, whereas Calvier et al detected intracellular galectin-3 mRNA

and protein, and it would be easier to detect changes in galectin-3 level intracellularly under the stimulation of a lower aldosterone concentration. Third, the tissue concentration of aldosterone is different from the plasma concentration. In the process of aldosterone-induced myocardial fibrosis, macrophages may be activated in cardiac tissue rather than in peripheral blood. In a previous study, the tissue aldosterone concentration was reported to be 6 pg/mg in atrial tissue [33]. However, the tissue concentration is measured from total tissue extract diluted in a fixed volume. Therefore, PAC and tissue aldosterone concentration cannot be compared directly.

**Table 1. Clinical data of the patients.**

| Patient characteristics           | Group 1 (n = 7) | Group 2 (n = 16) | p value |
|-----------------------------------|-----------------|------------------|---------|
| Age, years                        | 49±8            | 53±7             | 0.219   |
| Male sex                          | 2 (29)          | 3 (19)           | 0.621   |
| Hypertension history, years       | 4.8±5.8         | 4.5±4.2          | 0.900   |
| Body weight, kg                   | 61±11           | 60±10            | 0.768   |
| Body height, cm                   | 160±9           | 161±8            | 0.830   |
| Creatinine                        | 0.8±0.2         | 0.9±0.2          | 0.246   |
| SBP, mmHg                         | 150±22          | 145±18           | 0.523   |
| DBP, mmHg                         | 94±13           | 87±10            | 0.180   |
| Potassium, mmol/L                 | 3.6±0.7         | 4.1±0.3          | 0.122   |
| PAC, ng/dL                        | 77±42           | 26±19            | 0.019   |
| PRA, ng/mL/h                      | 0.6±0.8         | 7.0±8.3          | 0.008   |
| ARR                               | 2638±4310       | 15±18            | 0.158   |
| Log PAC                           | 1.8±0.3         | 1.4±0.2          | 0.001   |
| Log PRA                           | -0.8±0.9        | 0.5±0.5          | <0.001  |
| Log ARR                           | 2.6±1.1         | 0.8±0.6          | 0.004   |
| Number of anti-hypertensive agent | 2.1±1.3         | 1.6±1.0          | 0.252   |
| Galectin-3, ng/ml                 | 2.1±0.9         | 1.2±0.7          | 0.020   |

Values are mean ± SD or number (percentage). APA = aldosterone producing adenoma; EH = essential hypertension; SBP = systolic blood pressure; DBP = diastolic blood pressure; PAC = plasma aldosterone concentration; PRA = plasma renin activity; ARR = aldosterone-renin ratio. doi:10.1371/journal.pone.0095254.t001

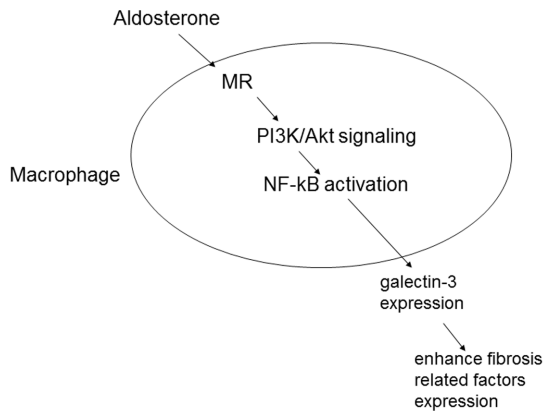

**Figure 9. Schematic signaling and possible function of aldosterone-induced galectin-3 expression in macrophages.** Through a MR/PI3K/Akt/NF-κB signaling pathway, aldosterone-induced galectin-3 expression enhanced fibrosis-related factor expression in fibroblasts.  
doi:10.1371/journal.pone.0095254.g009

There are some limitations to this study. First, this study focused on the process of aldosterone-induced galectin-3 secretion, and the relationship between aldosterone-induced galectin-3 secretion and fibrosis was only studied in cellular experiments. Further animal and human studies related to this topic are needed to obtain a full understanding of the mechanism. Second, the number of patients in the clinical study was small, and the clinical findings of this study should be confirmed by a larger clinical study. Further, the correlation between plasma aldosterone and galectin-3 concentration was borderline significant. This relationship should also be studied in a larger clinical study.

## References

- Rossi GP (2010) Prevalence and diagnosis of primary aldosteronism. *Curr Hypertens Rep* 12: 342–348.
- Weber KT, Gerling IC, Kiani MF, Guntaka RV, Sun Y, et al. (2003) Aldosteronism in heart failure: a proinflammatory/fibrogenic cardiac phenotype. Search for biomarkers and potential drug targets. *Curr Drug Targets* 4: 505–516.
- Pitt B, Zannad F, Remme WJ, Cody R, Castaigne A, et al. (1999) The effect of spironolactone on morbidity and mortality in patients with severe heart failure. Randomized Aldactone Evaluation Study Investigators. *N Engl J Med* 341: 709–717.
- Brilla CG, Weber KT (1992) Reactive and reparative myocardial fibrosis in arterial hypertension in the rat. *Cardiovasc Res* 26: 671–677.
- Rossi GP, Di Bello V, Ganzaroli C, Sacchetto A, Cesari M, et al. (2002) Excess aldosterone is associated with alterations of myocardial texture in primary aldosteronism. *Hypertension* 40: 23–27.
- Kozakova M, Buralli S, Palombo C, Bernini G, Moretti A, et al. (2003) Myocardial ultrasonic backscatter in hypertension: relation to aldosterone and endothelin. *Hypertension* 41: 230–236.
- Yoshitomi Y, Nishikimi T, Abe H, Yoshiwara F, Suzuki T, et al. (1996) Comparison of changes in cardiac structure after treatment in secondary hypertension. *Hypertension* 27: 319–323.
- Catena C, Colussi G, Lapenna R, Nadalini E, Chiuch A, et al. (2007) Long-term cardiac effects of adrenalectomy or mineralocorticoid antagonists in patients with primary aldosteronism. *Hypertension* 50: 911–918.
- Lin YH, Lee HH, Liu KL, Lee JK, Shih SR, et al. (2011) Reversal of myocardial fibrosis in patients with unilateral hyperaldosteronism receiving adrenalectomy. *Surgery* 150: 526–533.
- Lin YH, Wu XM, Lee HH, Lee JK, Liu YC, et al. (2012) Adrenalectomy reverses myocardial fibrosis in patients with primary aldosteronism. *J Hypertens* 30: 1606–1613.
- Rickard AJ, Morgan J, Tesch G, Funder JW, Fuller PJ, et al. (2009) Deletion of mineralocorticoid receptors from macrophages protects against deoxycorticosterone/salt-induced cardiac fibrosis and increased blood pressure. *Hypertension* 54: 537–543.
- Sharma UC, Pokharel S, van Brakel TJ, van Berlo JH, Cleutjens JP, et al. (2004) Galectin-3 marks activated macrophages in failure-prone hypertrophied hearts and contributes to cardiac dysfunction. *Circulation* 110: 3121–3128.
- Azibani F, Benard L, Schlossarek S, Merval R, Tournoux F, et al. (2012) Aldosterone inhibits antifibrotic factors in mouse hypertensive heart. *Hypertension* 59: 1179–1187.
- Lok DJ, Van Der Meer P, de la Porte PW, Lipsic E, Van Wijngaarden J, et al. (2010) Prognostic value of galectin-3, a novel marker of fibrosis, in patients with chronic heart failure: data from the DEAL-HF study. *Clin Res Cardiol* 99: 323–328.
- Lin YH, Lin LY, Wu YW, Chien KL, Lee CM, et al. (2009) The relationship between serum galectin-3 and serum markers of cardiac extracellular matrix turnover in heart failure patients. *Clin Chim Acta* 409: 96–99.
- Liu FT, Hsu DK, Zuberi RI, Kuwabara I, Chi EY, et al. (1995) Expression and function of galectin-3, a beta-galactoside-binding lectin, in human monocytes and macrophages. *Am J Pathol* 147: 1016–1028.
- Nishi Y, Sano H, Kawashima T, Okada T, Kuroda T, et al. (2007) Role of galectin-3 in human pulmonary fibrosis. *Allergol Int* 56: 57–65.
- Henderson NC, Mackinnon AC, Farnworth SL, Poirier F, Russo FP, et al. (2006) Galectin-3 regulates myofibroblast activation and hepatic fibrosis. *Proc Natl Acad Sci U S A* 103: 5060–5065.
- Henderson NC, Mackinnon AC, Farnworth SL, Kipari T, Haslett C, et al. (2008) Galectin-3 expression and secretion links macrophages to the promotion of renal fibrosis. *Am J Pathol* 172: 288–298.
- Laurent C, Maria M, Pascal R, Victoria C, Ernesto MM, et al. (2012) Galectin-3 Mediates Aldosterone-Induced Vascular Fibrosis. *Arterioscler Thromb Vasc Biol*.
- Guevremont M, Martel-Pelletier J, Boileau C, Liu FT, Richard M, et al. (2004) Galectin-3 surface expression on human adult chondrocytes: a potential substrate for collagenase-3. *Ann Rheum Dis* 63: 636–643.
- Spirin KS, Saghizadeh M, Lewin SL, Zardi L, Kenney MC, et al. (1999) Basement membrane and growth factor gene expression in normal and diabetic human retinas. *Curr Eye Res* 18: 490–499.
- Kim MS, Kim YK, Cho KH, Chung JH (2006) Regulation of type I procollagen and MMP-1 expression after single or repeated exposure to infrared radiation in human skin. *Mech Ageing Dev* 127: 875–882.
- Wu VC, Kuo CC, Chang HW, Tsai CT, Lin CY, et al. (2010) Diagnosis of primary aldosteronism: comparison of post-captopril active renin concentration and plasma renin activity. *Clin Chim Acta* 411: 657–663.

## Conclusion

Aldosterone could induce galectin-3 secretion in macrophage cell lines and further enhance collagen formation by fibroblasts. The pathway was through mineralocorticoid receptors, and the PI3K/Akt and NF-κB transcription pathways. Galectin-3 secretion induced by aldosterone was further confirmed by an aldosterone-infusing mouse model. The association between aldosterone and galectin-3 was also found in a preliminary clinical study.

## Acknowledgments

We thank Dr. Aaron Chen for English editing and the staff of the Second Core Lab of the Department of Medical Research in National Taiwan University Hospital for technical assistance.

Membership of the Taiwan Primary Aldosteronism Investigation (TAIPAI) Study Group: Che-Hsiung Wu, MD (Chi-Taz Hospital, PI of Committee); Vin-Cent Wu, MD (NTUH, PI of Committee); Yen-Hung Lin, MD (NTUH, PI of Committee); Yi-Luwn Ho, MD, PhD (NTUH, PI of Committee); Hung-Wei Chang, MD, PhD (Far Eastern Hospital, PI of Committee); Lian-Yu Lin MD, PhD (NTUH, PI of Committee); Fu-Chang Hu, MS, ScD (Harvard Statistics, Site Investigator); Kao-Lang Liu, MD (NTUH, PI of Committee); Shuo-Meng Wang, MD (NTUH, PI of Committee); Kuo-How Huang, MD (NTUH, PI of Committee); Yung-Ming Chen, MD (NTUH, PI of Committee); Chin-Chi Kuo, MD (Yun-Lin, PI of Committee); Chin-Chen Chang, MD (NTUH, PI of Committee); Shih-Cheng Liao, MD (NTUH, PI of Committee); Ruoh-Fang Yen, MD, PhD (NTUH, PI of Committee); and Kwan-Dun Wu, MD, PhD (NTUH, Director of Coordinating Center).

## Author Contributions

Conceived and designed the experiments: YHL YLH FJH KDW. Performed the experiments: CHC YYC CSH YLT. Analyzed the data: CHC YHC XMW VCW. Wrote the paper: YHL CHC YLH.

25. Kuo CC, Wu VC, Huang KH, Wang SM, Chang CC, et al. (2011) Verification and evaluation of aldosteronism demographics in the Taiwan Primary Aldosteronism Investigation Group (TAIPAI Group). *J Renin Angiotensin Aldosterone Syst* 12: 348–357.
26. Wu VC, Yang SY, Lin JW, Cheng BW, Kuo CC, et al. (2011) Kidney impairment in Primary Aldosteronism. *Clin Chim Acta*.
27. Yen RF, Wu VC, Liu KL, Cheng MF, Wu YW, et al. (2009) <sup>131</sup>I-6beta-iodomethyl-19-norcholesterol SPECT/CT for primary aldosteronism patients with inconclusive adrenal venous sampling and CT results. *J Nucl Med* 50: 1631–1637.
28. Rundback JH, Sacks D, Kent KC, Cooper C, Jones D, et al. (2002) Guidelines for the reporting of renal artery revascularization in clinical trials. American Heart Association. *Circulation* 106: 1572–1585.
29. Sun Y, Ramires FJ, Weber KT (1997) Fibrosis of atria and great vessels in response to angiotensin II or aldosterone infusion. *Cardiovasc Res* 35: 138–147.
30. Brilla CG, Pick R, Tan LB, Janicki JS, Weber KT (1990) Remodeling of the rat right and left ventricles in experimental hypertension. *Circ Res* 67: 1355–1364.
31. Ochieng J, Furtak V, Lukyanov P (2004) Extracellular functions of galectin-3. *Glycoconj J* 19: 527–535.
32. Calvier L, Miana M, Reboul P, Cachofeiro V, Martinez-Martinez E, et al. (2013) Galectin-3 mediates aldosterone-induced vascular fibrosis. *Arterioscler Thromb Vasc Biol* 33: 67–75.
33. Tsai CT, Chiang FT, Tseng CD, Hwang JJ, Kuo KT, et al. (2010) Increased expression of mineralocorticoid receptor in human atrial fibrillation and a cellular model of atrial fibrillation. *J Am Coll Cardiol* 55: 758–770.
